# Supplementary material for: The chaperonin CCT inhibits assembly of α-synuclein amyloid fibrils by a specific, conformation-dependent interaction
Source: PubMed Central journal article supplement (PMC5244355; doi:10.1038/srep40859), 2017-01-19
Supplement: srep40859-s1.pdf [file srep40859-s1.pdf]

**The chaperonin CCT inhibits assembly of  $\alpha$ -synuclein amyloid fibrils by a specific, conformation-dependent interaction**

Begoña Sot<sup>1,2,\*</sup>, Alejandra Rubio-Muñoz<sup>1,2</sup>, Ahudrey Leal-Quintero<sup>1,†</sup>, Javier Martinez-Sabando<sup>1</sup>, Miguel Marcilla<sup>3</sup>, Cintia Roodveldt<sup>4</sup>, José M. Valpuesta<sup>1,\*</sup>

**Supplementary Figures**

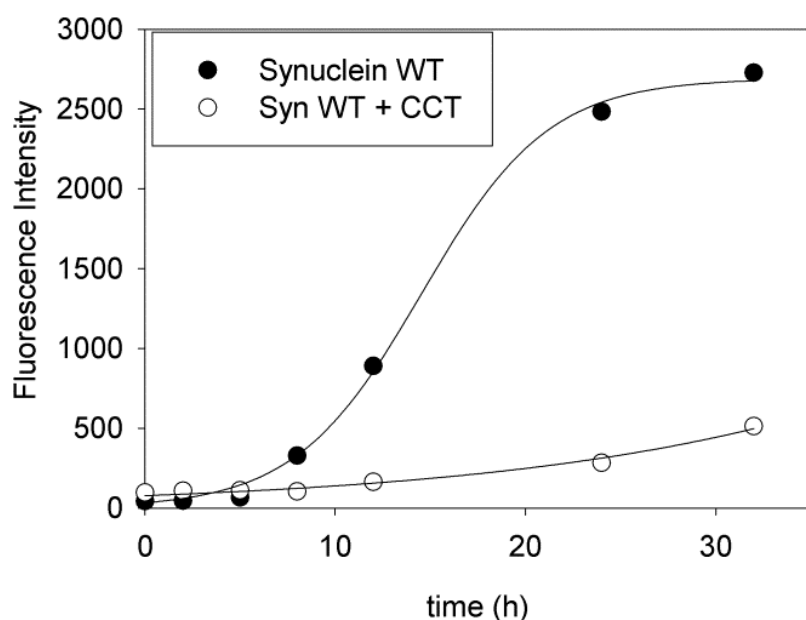

**Figure S1. CCT inhibits  $\alpha$ -syn wild type fibrillation.** (A) Fibrillation kinetics of  $\alpha$ -syn WT alone and with CCT (1:10 CCT: $\alpha$ -syn A53T molar ratio), as measured by ThT fluorescence. CCT alone was used a control, and showed no significant fluorescence increase. The fluorescence data is normalized as a percentage of the maximum fluorescence obtained. A representative experiment is shown.

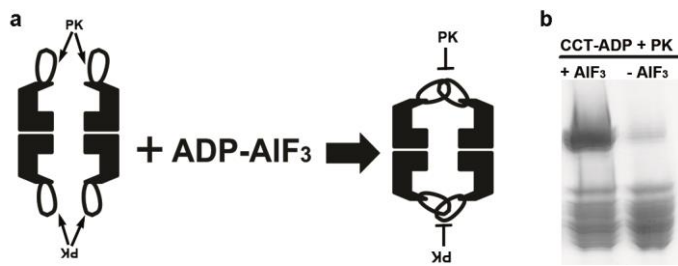

**Figure S2. The CCT-ADP-AIF<sub>3</sub> complex maintains the CCT lid closed.** (a) Scheme showing lid movements after binding to ADP-AIF<sub>3</sub>; proteinase K (PK) cleavage sites in the lid are indicated. (b) The closure of the CCT cavity was tested using proteolysis protection. The lid of CCT monomers can be cleaved by proteinase K. Closure of the chaperonin lid is induced and stabilized by CCT incubation with ADP-AIF<sub>3</sub>, and is therefore protected from proteolysis.

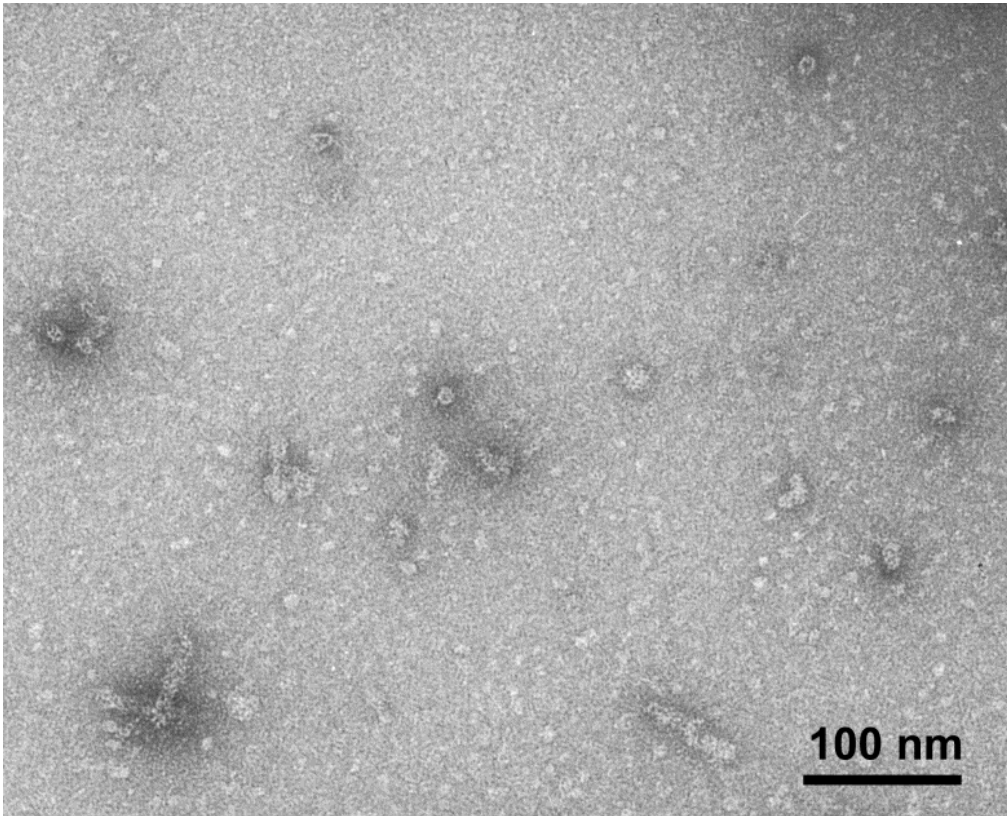

**Figure S3. TEM images of  $\alpha$ -syn A53T oligomers**

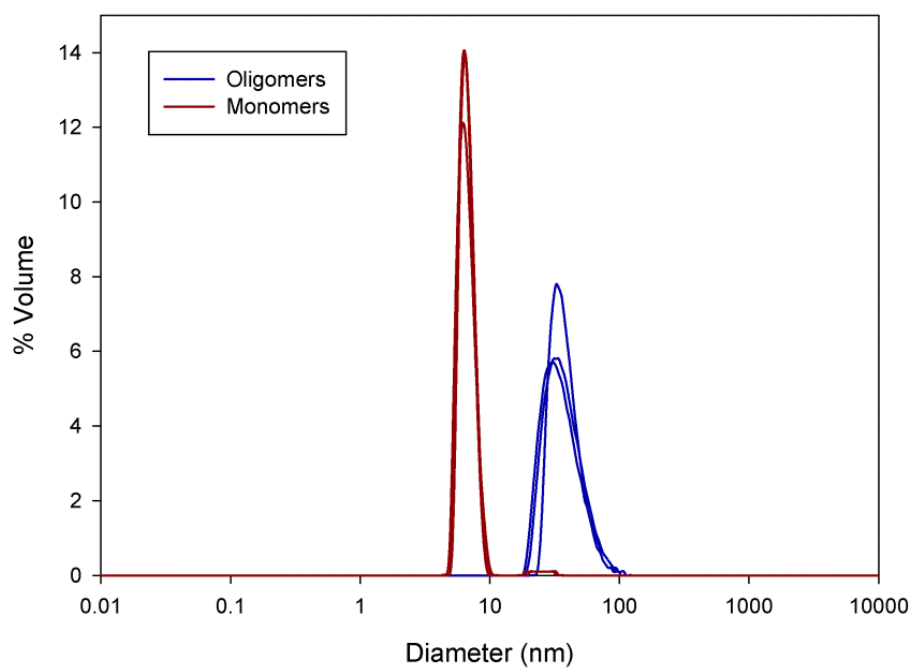

**Figure S4. Dynamic light scattering (DLS) experiments of  $\alpha$ -syn A53T monomers (red) and oligomers (blue).** Size distribution of the molecules present, expressed as a percentage of volume.

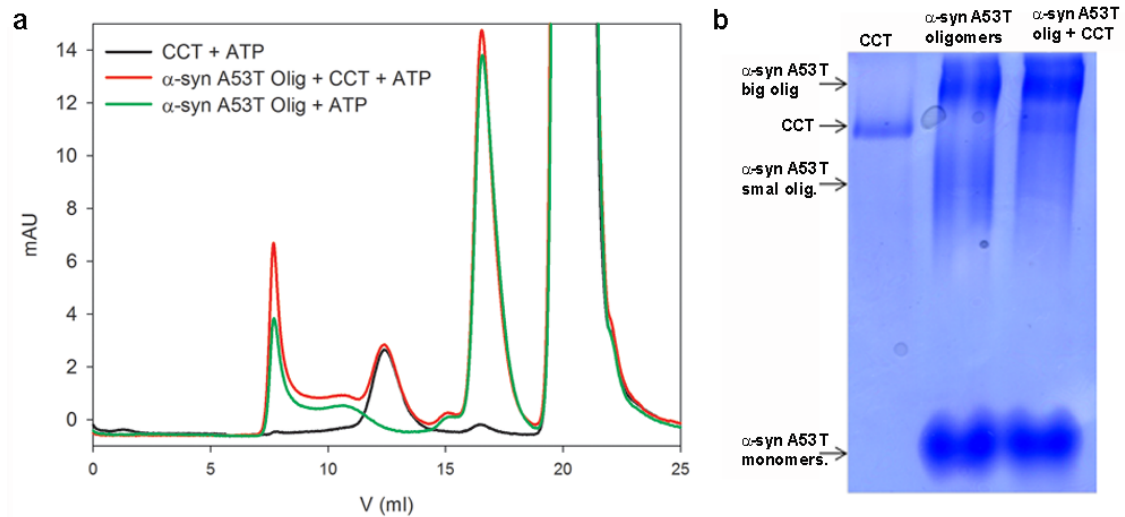

**Figure S5. Effect of CCT and ATP in  $\alpha$ -syn A53T oligomers.** (a) SEC analyses of CCT,  $\alpha$ -syn A53T oligomers and the mixture of both, preincubated 1h with 30 mM ATP before loading. Oligomers eluted at 8 and 10 ml, CCT at 12 ml, monomers at 17 ml. The peak at 20 ml corresponds to the nucleotide. (b) Native 5.5% acrilamide gels of CCT,  $\alpha$ -syn A53T oligomers and the mixture of both, pre-incubated 1h with 30 mM ATP before loading.

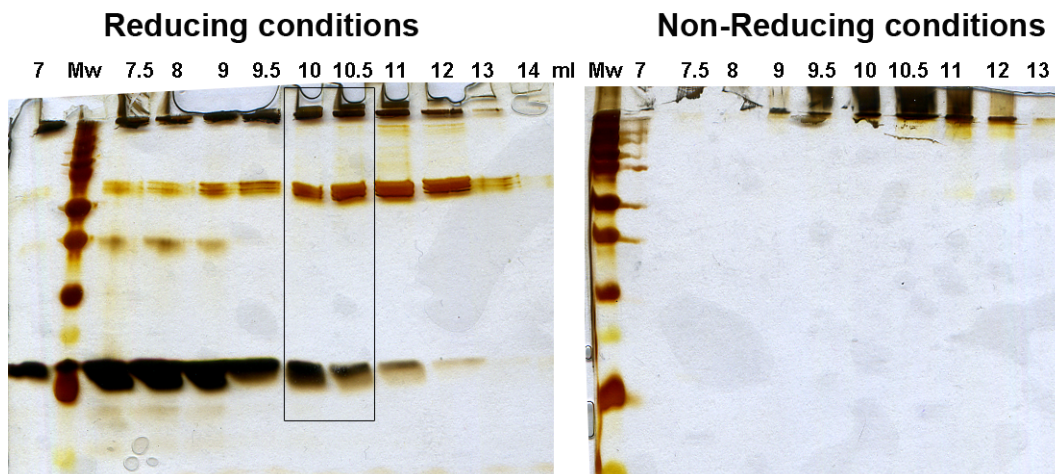

**Figure S6. Silver-stained SDS-PAGE showing crosslinked CCT- $\alpha$ -syn A53T oligomer complexes after elution from Superose 6 in reducing and non-reducing conditions.** Each lane is labelled with the elution volume (ml). Mw, molecular weight markers. In non-reducing conditions (right), the crosslinked proteins did not enter the gel. In reducing conditions (left), DTSSP was reduced and the individual proteins visualized, showing that the complex is present. Fractions eluted at 10 and 10.5 ml (black rectangle) were analysed by LC-MS/MS.

**Table S1. Detailed information of intermolecular crosslinked peptides identified**

| Score | m/z      | z | Dev(ppm) | Peptide(1)     | Protein(1)          | From(1) | To(1) | Peptide(2)               | Protein(2)          | From(2) | To(2) | Site(1) | Site(2) | Rank | FDR   | Inside Cavity |
|-------|----------|---|----------|----------------|---------------------|---------|-------|--------------------------|---------------------|---------|-------|---------|---------|------|-------|---------------|
| 290   | 1134.909 | 3 | -19.73   | {MAAVKTLNPK}   | CCT $\zeta$         | 0       | 10    | [TKEQVTN/GGAVVTGVTAVAQK] | $\alpha$ -Synuclein | 59      | 80    | K10     | K2      | 1    | 0.000 | Yes           |
| 222   | 580.310  | 4 | 12.24    | {AKEGVVAAAEEK} | $\alpha$ -Synuclein | 11      | 21    | {MAAVKTLNPK}             | CCT $\zeta$         | 0       | 10    | K2      | K5      | 1    | 0.000 | Yes           |
| 169   | 754.349  | 3 | 0.16     | {MDVFMK}       | $\alpha$ -Synuclein | 0       | 6     | {GASKEILSEVER}           | CCT $\gamma$        | 378     | 389   | {0}     | K4      | 1    | 0.000 | Yes           |
| 161   | 1036.883 | 3 | -10.39   | {VDNIKAAAPRRK} | CCT $\beta$         | 517     | 528   | {TKEGVVHGVTTVAEK}        | $\alpha$ -Synuclein | 44      | 58    | K11     | K2      | 1    | 0.044 | Yes           |
| 117   | 708.67   | 3 | 10.42    | {EGVLYVGSK}    | $\alpha$ -Synuclein | 35      | 43    | {VQAHSNSK}               | CCT $\zeta$         | 466     | 474   | S8      | S8      | 2    | 0.054 | No            |
| 115   | 589.049  | 4 | 5.63     | {mVINHLEK}     | CCT $\theta$        | 55      | 62    | {TKEGVLVYVGSK}           | $\alpha$ -Synuclein | 33      | 43    | K8      | K11     | 2    | 0.063 | Yes           |
| 98    | 580.813  | 4 | -5.42    | {MGIK}         | CCT $\eta$          | 194     | 199   | {GLSKAKEGVVAAAEEK}       | $\alpha$ -Synuclein | 7       | 21    | K6      | K6      | 1    | 0.067 | Yes           |
| 95    | 560.903  | 5 | -15.68   | {SVTLIKGPNK}   | CCT $\zeta$         | 371     | 381   | {GLSKAKEGVVAAAEEK}       | $\alpha$ -Synuclein | 7       | 21    | K11     | K4      | 1    | 0.07  | Yes           |
| 92    | 682.657  | 3 | -6.96    | {EGVAAAEEK}    | $\alpha$ -Synuclein | 13      | 21    | {mVINHLEK}               | CCT $\theta$        | 55      | 62    | K9      | K8      | 2    | 0.072 | Yes           |
| 92    | 910.208  | 4 | -0.21    | {LIANTGmDTDK}  | CCT $\beta$         | 237     | 248   | {TKEQVTN/GGAVVTGVTAVAQK} | $\alpha$ -Synuclein | 59      | 80    | K12     | K2      | 3    | 0.072 | Yes           |
